# Supplementary material
Source: PubMed Central journal article supplement (PMC9378753)
Supplement: NIHMS1795121-supplement-1.pdf [file NIHMS1795121-supplement-1.pdf]

## Supplemental Table 1: Agreement data from round 1 of the Delphi voting process (n=85)

The umbrella term for disorders of GI tract eosinophilic inflammation in the absence of secondary causes should be “eosinophilic gastrointestinal disease” (EGID)

Strongly agree: 58 (68)  
Agree: 24 (28)  
Neither agree nor disagree: 1 (1)  
Disagree: 1 (1)  
Strongly disagree: 1 (1)

When an EGID involves only the esophagus, the name should remain “eosinophilic esophagitis” (EoE)

Strongly agree: 69 (81)  
Agree: 14 (16)  
Neither agree nor disagree: 0 (0)  
Disagree: 1 (1)  
Strongly disagree: 1 (1)

When an EGID involves only the stomach, the name should be “eosinophilic gastritis”

Strongly agree: 56 (66)  
Agree: 25 (19)  
Neither agree nor disagree: 1 (1)  
Disagree: 2 (2)  
Strongly disagree: 1 (1)

The abbreviation for eosinophilic gastritis should be “EG”

Strongly agree: 44 (52)  
Agree: 29 (25)  
Neither agree nor disagree: 6 (6)  
Disagree: 5 (6)  
Strongly disagree: 0 (0)

When an EGID involves only the colon, the name should be “eosinophilic colitis”

Strongly agree: 55 (65)  
Agree: 25 (30)  
Neither agree nor disagree: 2 (2)  
Disagree: 1 (10)  
Strongly disagree: 1 (1)

The abbreviation for eosinophilic colitis should be “EC”

Strongly agree: 43 (51)  
Agree: 30 (35)  
Neither agree nor disagree: 8 (9)  
Disagree: 4 (5)  
Strongly disagree: 0 (0)

When an EGID involves the small intestine, the name should reflect the area(s) of involvement

Strongly agree: 26 (31)  
Agree: 31 (37)  
Neither agree nor disagree: 17 (20)  
Disagree: 10 (12)  
Strongly disagree: 1 (1)

When an EGID involves only the duodenum, the name should be “eosinophilic duodenitis”

Strongly agree: 30 (35)  
Agree: 24 (40)  
Neither agree nor disagree: 9 (11)  
Disagree: 12 (14)  
Strongly disagree: 0 (0)

The abbreviation for eosinophilic duodenitis should be “EoD”

Strongly agree: 28 (33)  
Agree: 30 (36)  
Neither agree nor disagree: 18 (21)  
Disagree: 9 (11)  
Strongly disagree: 0 (0)

When an EGID involves only the jejunum, the name should be “eosinophilic jejunitis”

Strongly agree: 27 (32)  
Agree: 27 (33)  
Neither agree nor disagree: 17 (20)  
Disagree: 13 (0)  
Strongly disagree: 0 (0)

The abbreviation for eosinophilic jejunitis should be “EoJ”

Strongly agree: 24 (28)  
Agree: 30 (36)  
Neither agree nor disagree: 20 (24)  
Disagree: 11 (13)  
Strongly disagree: 0 (0)

When an EGID involves only the ileum, the name should be “eosinophilic ileitis”

Strongly agree: 30 (35)  
Agree: 29 (35)  
Neither agree nor disagree: 14 (17)  
Disagree: 12 (14)  
Strongly disagree: 0 (0)

The abbreviation for eosinophilic ileitis should be “EoI”

Strongly agree: 23 (28)  
Agree: 29 (35)  
Neither agree nor disagree: 17 (21)  
Disagree: 14 (17)

When an EGID is known to involve the entire small intestine, but only the small intestine, the name should be “eosinophilic pan-enteritis”

Strongly agree: 24 (29)  
Agree: 26 (32)  
Neither agree nor disagree: 15 (19)  
Disagree: 16 (20)  
Strongly disagree: 1 (1)

The abbreviation for eosinophilic pan-enteritis should be “EN”

Strongly agree: 5 (6)  
Agree: 15 (18)  
Neither agree nor disagree: 23 (28)  
Disagree: 32 (39)  
Strongly disagree: 9 (11)

The term “eosinophilic gastroenteritis” should be removed from the EGID nomenclature system

Strongly agree: 8 (10)  
Agree: 21 (25)  
Neither agree nor disagree: 21 (25)  
Disagree: 25 (30)  
Strongly disagree: 9 (11)

For EGIDs that involve the stomach and/or small bowel and/or the colon, and ALSO the esophagus, the term EoE should NOT be used

Strongly agree: 29 (34)  
Agree: 32 (38)  
Neither agree nor disagree: 10 (12)  
Disagree: 11 (13)  
Strongly disagree: 3 (4)

For EGIDs that involve the stomach and/or small bowel and/or the colon, and ALSO the esophagus, the term to indicate this should be “with esophageal involvement”

Strongly agree: 21 (25)  
Agree: 42 (49)  
Neither agree nor disagree: 10 (12)  
Disagree: 10 (12)  
Strongly disagree: 2 (2)

When more than two GI tract areas (outside of the esophagus) are involved, the name should reflect the involved areas (ie stomach + duodenum = eosinophilic gastritis and duodenitis; duodenum + colon = eosinophilic duodenitis and colitis; etc)

Strongly agree: 22 (26)  
Agree: 43 (51)  
Neither agree nor disagree: 11 (13)  
Disagree: 8 (9)  
Strongly disagree: 1 (1)

Eosinophilic gastritis can also be called "Gastric EGID" as a synonym

Strongly agree: 7 (8)  
Agree: 37 (44)  
Neither agree nor disagree: 13 (15)  
Disagree: 23 (27)  
Strongly disagree: 5 (6)

Eosinophilic duodenitis can also be called "Duodenal EGID" as a synonym

Strongly agree: 7 (8)  
Agree: 32 (38)  
Neither agree nor disagree: 17 (20)  
Disagree: 24 (28)  
Strongly disagree: 5 (6)

Eosinophilic jejunitis can also be called "Jejunal EGID" as a synonym

Strongly agree: 7 (8)  
Agree: 31 (36)  
Neither agree nor disagree: 18 (21)  
Disagree: 24 (28)  
Strongly disagree: 5 (6)

Eosinophilic ileitis can also be called "Ileal EGID" as a synonym

Strongly agree: 7 (8)  
Agree: 32 (38)  
Neither agree nor disagree: 17 (20)  
Disagree: 24 (28)  
Strongly disagree: 5 (6)

Eosinophilic pan-enteritis can also be called "Small bowel EGID" as a synonym

Strongly agree: 7 (8)  
Agree: 36 (42)  
Neither agree nor disagree: 15 (18)  
Disagree: 22 (26)  
Strongly disagree: 5 (6)

Eosinophilic colitis can also be called "Colonic EGID" as a synonym

Strongly agree: 8 (9)  
Agree: 38 (45)  
Neither agree nor disagree: 12 (14)  
Disagree: 8 (9)  
Strongly disagree: 5 (6)

The GI wall layer of involvement (or if this is unknown) should be included in the EGID nomenclature system with sub-codes

Strongly agree: 15 (18)  
Agree: 42 (49)  
Neither agree nor disagree: 17 (20)  
Disagree: 11 (13)  
Strongly disagree: 0 (0)

Complications of EGIDs (for example, protein-losing enteropathy, ascites, or numerous others) should be included in the EGID nomenclature system with sub-codes

Strongly agree: 15 (18)  
Agree: 40 (47)  
Neither agree nor disagree: 18 (21)  
Disagree: 10 (12)  
Strongly disagree: 2 (2)

Any areas of the GI tract that are not investigated or have unknown involvement should be included in the EGID nomenclature system with sub-codes

Strongly agree: 10 (12)  
Agree: 20 (24)  
Neither agree nor disagree: 30 (35)  
Disagree: 21 (25)  
Strongly disagree: 4 (5)

Journal Pre-proof
